# Supplementary material for: The Role of Cognition and Social Factors in Competition: How Do People with Intellectual Disabilities Respond to Opponents?
Source: MDPI journal article supplement (doi:10.3390/ijerph20032670), 2023-02-02
Supplement: s1 [file s1]

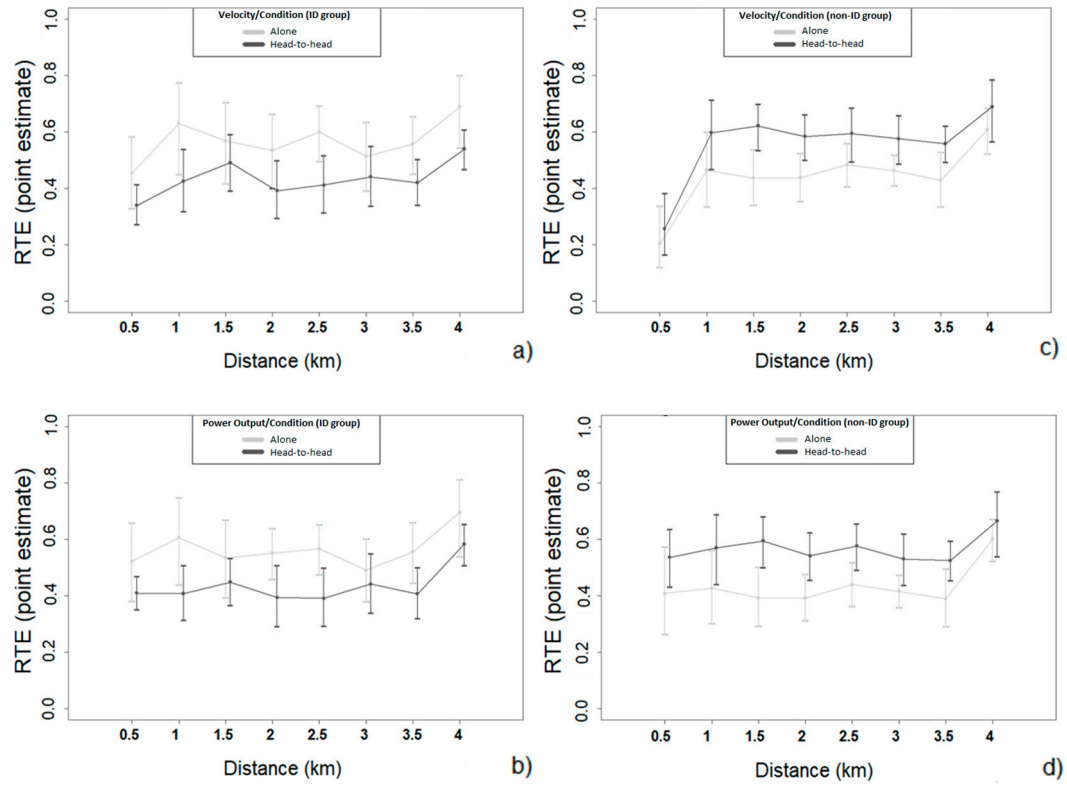

**Figure S1.** Relative effects and 95% confidence intervals for the velocity and power output of the ID (a,b) and non-ID group (c,d) during the 'alone' and 'head-to-head' condition
